# Supplementary material for: Anti-cancer properties of cannflavin A and potential synergistic effects with gemcitabine, cisplatin, and cannabinoids in bladder cancer
Source: Springer Nature journal article supplement (doi:10.1186/s42238-022-00151-y), 2022-07-22
Supplement: MOESM1 [file 42238_2022_151_MOESM1_ESM.pdf]

# Supplemental Figure 2

T24

TCCSUP

Cannflavin A

$\Delta 9$ -THC

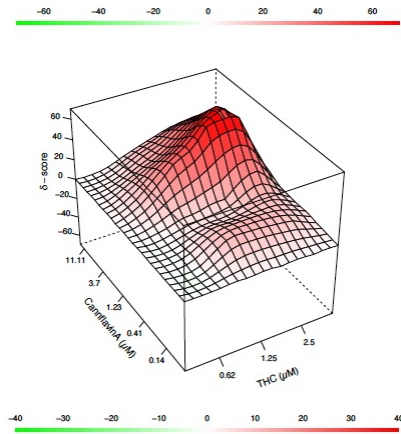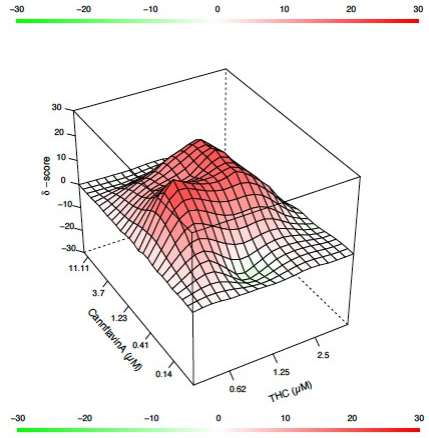

Cannabidiol

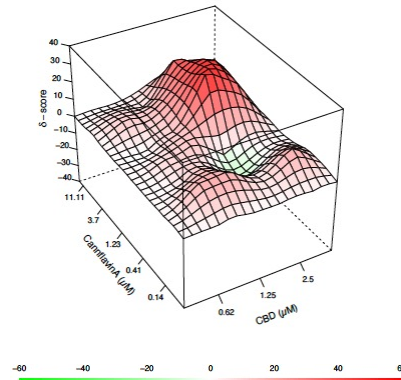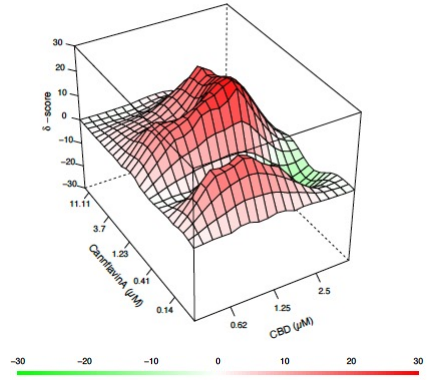

Cannabichromene

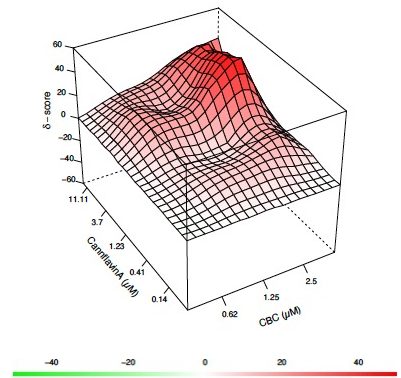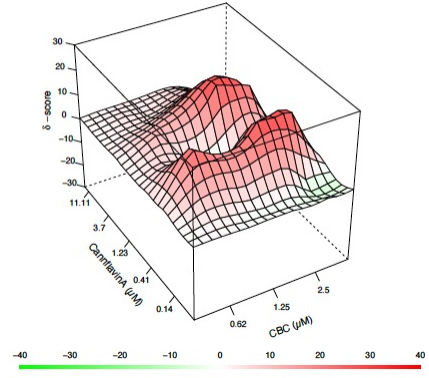

Cannabivarin

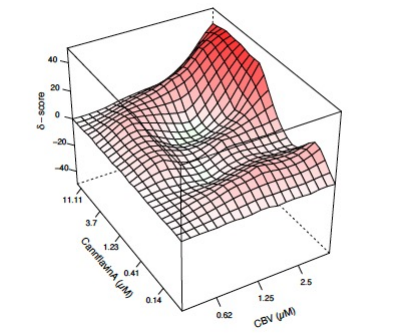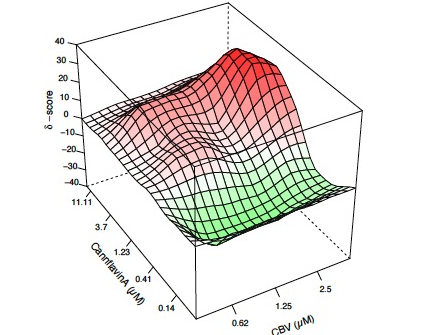

**SUPP FIG. 2. Assessment of synergy between cannflavin A and cannabinoids**

3D synergy landscapes for the combinations of increasing concentrations of cannflavin A with THC, cannabidiol, cannabichromene or cannabivarin in T24 and TCCSUP cells.
